# Supplementary material
Source: Springer Nature journal article supplement (https://www.springermedizin.de/resource/supplementary/13229_2013_116_MOESM6_ESM.pdf/9676208)

**Figure 3.**

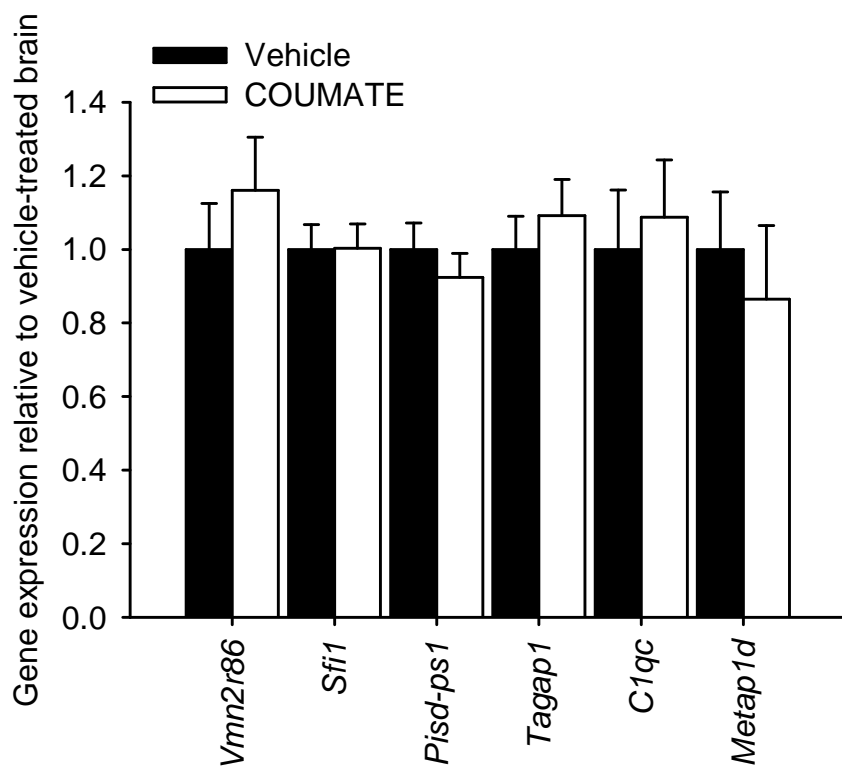

Supplement: MOESM6 [file 9676208]
